# Supplementary material for: Impact of indoor residual spraying with pirimiphos-methyl (Actellic 300CS) on entomological indicators of transmission and malaria case burden in Migori County, western Kenya
Source: PubMed Central journal article supplement (PMC7066154; doi:10.1038/s41598-020-61350-2), 2020-03-11
Supplement: 41598_2020_61350_MOESM1_ESM.pdf [file 41598_2020_61350_MOESM1_ESM.pdf]

**Impact of indoor residual spraying with pirimiphos-methyl (Actellic 300CS) on entomological indicators of transmission and malaria case burden in Migori County, western Kenya**

**Authors**

Bernard Abong'o<sup>1,2,3</sup>, John E. Gimnig<sup>4</sup>, Stephen J. Torr<sup>2</sup>, Bradley Longman<sup>1</sup>, Diana Omoke<sup>1</sup>, Margaret Muchoki<sup>1</sup>, Feiko ter Kuile<sup>2</sup>, Eric Ochomo<sup>3</sup>, Stephen Munga<sup>3</sup>, Aaron M. Samuels<sup>4</sup>, Kiambo Njagi<sup>5</sup>, James Maas<sup>2</sup>, Robert T. Perry<sup>6</sup>, Christen Fornadel<sup>7</sup>, Martin J. Donnelly<sup>2</sup>, Richard M. Oxborough<sup>8</sup>

**Institutional affiliation**

<sup>1</sup>Abt Associates Inc. PMI VectorLink Project, Whitehouse, Milimani, Kisumu, Ojijo Oteko Road, P.O. Box 895-40123, Kisumu, Kenya

<sup>2</sup>Liverpool School of Tropical Medicine, Pembroke Place, Liverpool, L3 5QA, UK

<sup>3</sup>Centre for Global Health Research, Kenya Medical Research Institute, P.O. Box 1578, Kisumu, Kenya

<sup>4</sup>Division of Parasitic Diseases and Malaria, Center for Global Health, Centers for Disease Control and Prevention, Atlanta, GA 30333, USA

<sup>5</sup>Kenya National Malaria Control Programme (NMCP), Ministry of Health, PO Box 19982, Kenyatta National Hospital, Nairobi 00202, Kenya

<sup>6</sup>The United States, Presidents Malaria Initiative (PMI), US Embassy Nairobi, United Nations Avenue, Nairobi, Kenya

<sup>7</sup>The United States, Presidents Malaria Initiative (PMI), US Agency for International Development, Washington, DC, USA

<sup>8</sup>PMI VectorLink Project, Abt Associates 6130 Executive Blv, Rockville, MD 20852, USA

## Supplementary figures

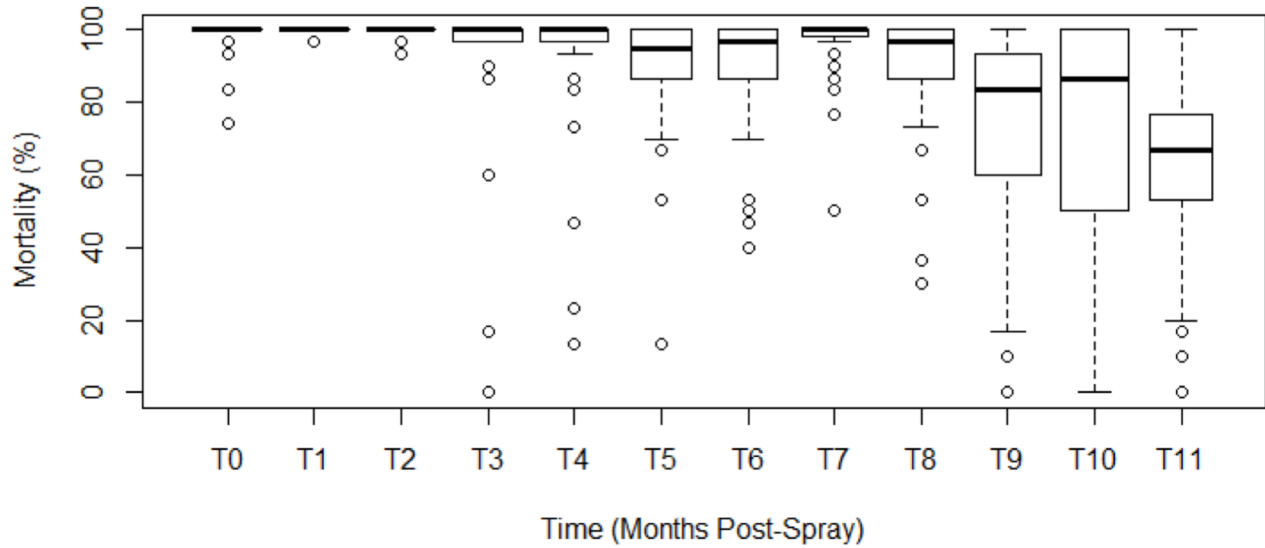

Supplemental Fig. 1. 24-hour mortality rates of susceptible *An. gambiae s.s.* exposed to mud and concrete sprayed walls over eleven months post-IRS. Distribution of mortality rates by box-whisker plots showing median values and interquartile ranges. Data were pooled for all sites.

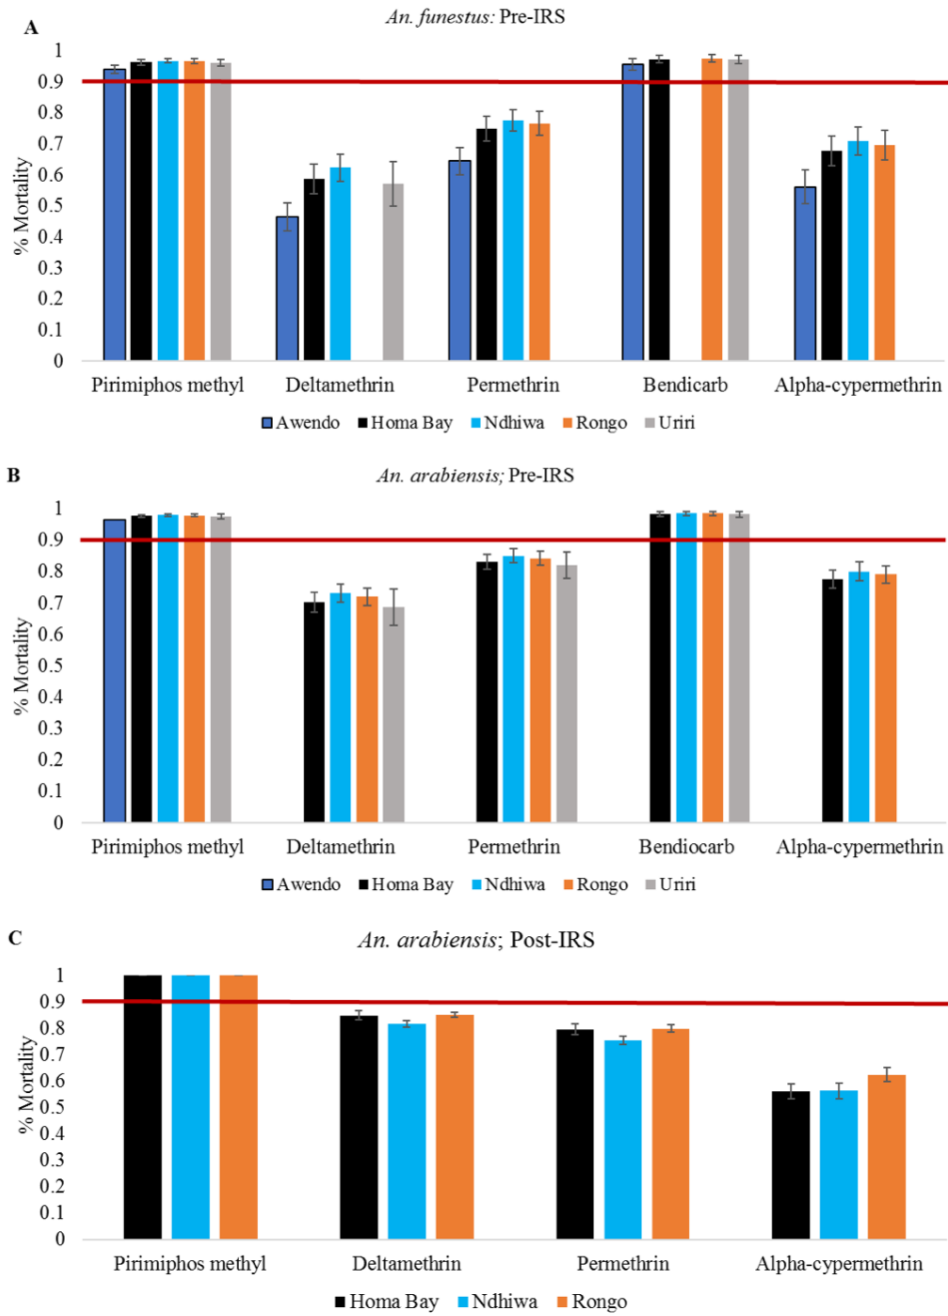

Supplemental Fig 2. 24-Hour mortality of *An. funestus* and *An. arabiensis* following exposure to pirimiphos-methyl, deltamethrin, permethrin, bendiocarb, and alpha-cypermethrin pre-IRS (Fig 2A and B) and post-IRS (Fig 2C) in WHO susceptibility test.

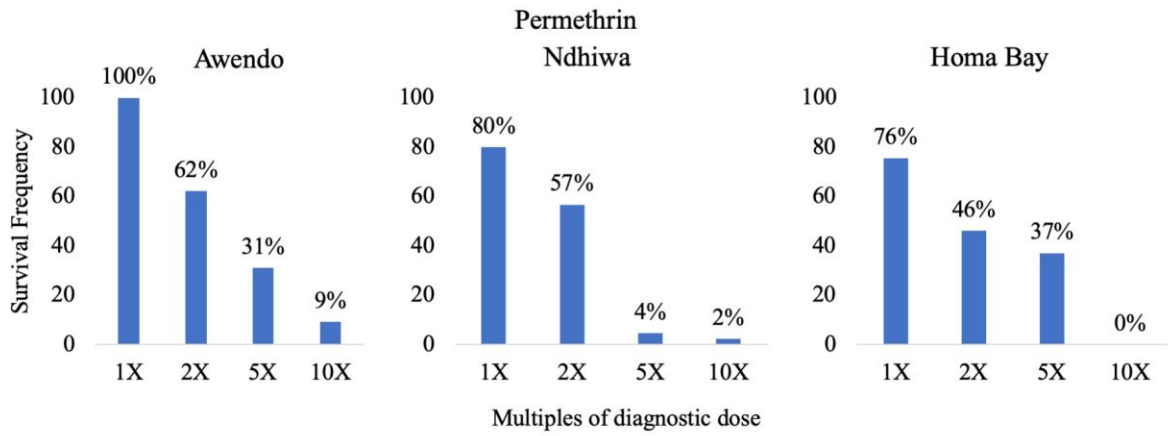

Supplemental Fig 3. 30 minutes survival frequency of *An. arabiensis* from Awendo, Ndhiwa, and Homa Bay sub-counties, exposed to multiples of diagnostic doses of permethrin.

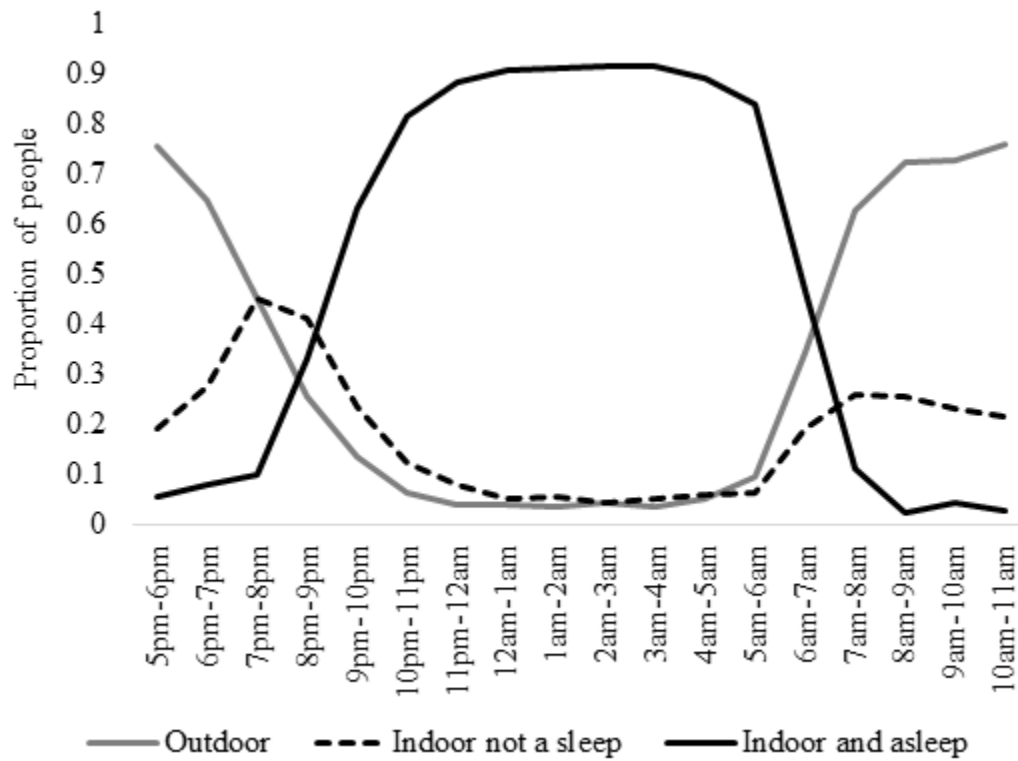

Supplemental Fig 4. Proportions of people within the study area at different locations during HLC collection.

## Supplementary Tables

**Supplemental Table 1.** Model table for *Anopheles funestus* collected in light traps. Conditional estimates for the effect of pre- versus post-spray conditional on IRS status are also included.

| Parameter                          | Level                  | Risk Ratio | Lower CL | Upper CL | t-value | P-value |
|------------------------------------|------------------------|------------|----------|----------|---------|---------|
| Intercept                          | Interceptor            | 0.4        | 0.2      | 0.8      | -2.841  | 0.013   |
| Period                             | Post Spray             | 0.98       | 0.69     | 1.38     | -0.127  | 0.899   |
|                                    | Pre Spray              | Ref        |          |          |         |         |
| Status                             | Intervention           | 0.64       | 0.28     | 1.45     | -1.063  | 0.288   |
|                                    | Control                | Ref        |          |          |         |         |
| Period*Status                      | PostSpray*Intervention | 0.12       | 0.07     | 0.21     | -7.513  | <0.001  |
|                                    | PostSpray*Control      | Ref        |          |          |         |         |
|                                    | PreSpray*Intervention  | Ref        |          |          |         |         |
|                                    | PreSpray*Control       | Ref        |          |          |         |         |
| Net Use                            | All under net          | 1.11       | 0.77     | 1.6      | 0.576   | 0.565   |
|                                    | Some under net         | 1.2        | 0.77     | 1.86     | 0.816   | 0.415   |
|                                    | None under net         | Ref        |          |          |         |         |
| Eaves                              | Closed                 | 0.68       | 0.48     | 0.96     | -2.174  | 0.030   |
|                                    | Partially open         | 0.84       | 0.56     | 1.27     | -0.817  | 0.414   |
|                                    | Open                   | Ref        |          |          |         |         |
| Cattle                             | Yes                    | 1.62       | 1.22     | 2.13     | 3.395   | 0.001   |
|                                    | No                     | Ref        |          |          |         |         |
| Period<br>(Conditional on IRS)     | Post Spray             | 0.12       | 0.07     | 0.19     | -8.615  | <0.001  |
|                                    | Pre Spray              | Ref        |          |          |         |         |
| Period<br>(Conditional on non-IRS) | Post Spray             | 0.98       | 0.69     | 1.38     | -0.127  | 0.899   |
|                                    | Pre Spray              | Ref        |          |          |         |         |

**Supplemental Table 2.** Model table for *Anopheles funestus* collected by pyrethrum spray catches. Conditional estimates for the effect of pre- versus post-spray conditional on IRS status are also included.

| <b>Parameter</b>                   | <b>Level</b>           | <b>Risk Ratio</b> | <b>Lower CL</b> | <b>Upper CL</b> | <b>t-value</b> | <b>P-value</b> |
|------------------------------------|------------------------|-------------------|-----------------|-----------------|----------------|----------------|
| Intercept                          | Interceptor            | 0.72              | 0.27            | 1.94            | -0.704         | 0.493          |
| Period                             | Post Spray             | 0.64              | 0.41            | 1.00            | -1.945         | 0.052          |
|                                    | Pre Spray              | Ref               |                 |                 |                |                |
| Status                             | Intervention           | 0.54              | 0.17            | 1.72            | -1.047         | 0.296          |
|                                    | Control                | Ref               |                 |                 |                |                |
| Period*Status                      | PostSpray*Intervention | 0.06              | 0.03            | 0.13            | -7.094         | <0.001         |
|                                    | PostSpray*Control      | Ref               |                 |                 |                |                |
|                                    | PreSpray*Intervention  | Ref               |                 |                 |                |                |
|                                    | PreSpray*Control       | Ref               |                 |                 |                |                |
| Net Use                            | All under net          | 0.96              | 0.61            | 1.5             | -0.187         | 0.852          |
|                                    | Some under net         | 2.02              | 1.13            | 3.59            | 2.383          | 0.017          |
|                                    | None under net         | Ref               |                 |                 |                |                |
| Eaves                              | Closed                 | 0.8               | 0.5             | 1.3             | -0.889         | 0.374          |
|                                    | Partially open         | 1.08              | 0.64            | 1.83            | 0.291          | 0.771          |
|                                    | Open                   | Ref               |                 |                 |                |                |
| Cattle                             | Yes                    | 1.63              | 1.12            | 2.35            | 2.583          | 0.010          |
|                                    | No                     | Ref               |                 |                 |                |                |
| Period<br>(Conditional on IRS)     | Post Spray             | 0.04              | 0.02            | 0.07            | -9.289         | <0.001         |
|                                    | Pre Spray              | Ref               |                 |                 |                |                |
| Period<br>(Conditional on non-IRS) | Post Spray             | 0.64              | 0.41            | 1               | -1.945         | 0.052          |
|                                    | Pre Spray              | Ref               |                 |                 |                |                |

**Supplemental Table 3.** Model table for *Anopheles arabiensis* collected in light traps. Conditional estimates for the effect of pre- versus post-spray conditional on IRS status are also included.

| <b>Parameter</b>                   | <b>Level</b>           | <b>Risk Ratio</b> | <b>Lower CL</b> | <b>Upper CL</b> | <b>t-value</b> | <b>P-value</b> |
|------------------------------------|------------------------|-------------------|-----------------|-----------------|----------------|----------------|
| Intercept                          | Interceptor            | 0.03              | 0.01            | 0.07            | -7.351         | <0.001         |
| Period                             | Post Spray             | 3.06              | 1.59            | 5.92            | 3.335          | 0.001          |
|                                    | Pre Spray              | Ref               |                 |                 |                |                |
| Status                             | Intervention           | 1.79              | 0.55            | 5.76            | 0.972          | 0.331          |
|                                    | Control                | Ref               |                 |                 |                |                |
| Period*Status                      | PostSpray*Intervention | 0.45              | 0.2             | 1.01            | -1.942         | 0.052          |
|                                    | PostSpray*Control      | Ref               |                 |                 |                |                |
|                                    | PreSpray*Intervention  | Ref               |                 |                 |                |                |
|                                    | PreSpray*Control       | Ref               |                 |                 |                |                |
| Net Use                            | All under net          | 1.95              | 0.99            | 3.84            | 1.94           | 0.052          |
|                                    | Some under net         | 2.17              | 1.02            | 4.62            | 2.008          | 0.045          |
|                                    | None under net         | Ref               |                 |                 |                |                |
| Eaves                              | Closed                 | 0.57              | 0.33            | 0.96            | -2.131         | 0.033          |
|                                    | Partially open         | 0.78              | 0.43            | 1.42            | -0.814         | 0.416          |
|                                    | Open                   | Ref               |                 |                 |                |                |
| Cattle                             | Yes                    | 1.33              | 0.89            | 1.98            | 1.383          | 0.167          |
|                                    | No                     | Ref               |                 |                 |                |                |
| Period<br>(Conditional on IRS)     | Post Spray             | 1.39              | 0.78            | 2.47            | 1.112          | 0.266          |
|                                    | Pre Spray              | Ref               |                 |                 |                |                |
| Period<br>(Conditional on non-IRS) | Post Spray             | 3.06              | 1.59            | 5.92            | 3.335          | 0.001          |
|                                    | Pre Spray              | Ref               |                 |                 |                |                |



**Supplemental Table 4.** Model table for *Anopheles arabiensis* collected by pyrethrum spray catches. Conditional estimates for the effect of pre- versus post-spray conditional on IRS status are also included.

| <b>Parameter</b>                   | <b>Level</b>           | <b>Risk Ratio</b> | <b>Lower CL</b> | <b>Upper CL</b> | <b>t-value</b> | <b>P-value</b> |
|------------------------------------|------------------------|-------------------|-----------------|-----------------|----------------|----------------|
| Intercept                          | Interceptor            | 0.12              | 0.04            | 0.38            | -3.954         | 0.001          |
| Period                             | Post Spray             | 1.64              | 0.87            | 3.09            | 1.543          | 0.123          |
|                                    | Pre Spray              | Ref               |                 |                 |                |                |
| Status                             | Intervention           | 1.16              | 0.3             | 4.44            | 0.214          | 0.831          |
|                                    | Control                | Ref               |                 |                 |                |                |
| Period*Status                      | PostSpray*Intervention | 0.36              | 0.16            | 0.82            | -2.445         | 0.015          |
|                                    | PostSpray*Control      | Ref               |                 |                 |                |                |
|                                    | PreSpray*Intervention  | Ref               |                 |                 |                |                |
|                                    | PreSpray*Control       | Ref               |                 |                 |                |                |
| Net Use                            | All under net          | 1.61              | 0.9             | 2.87            | 1.594          | 0.111          |
|                                    | Some under net         | 1.85              | 0.89            | 3.84            | 1.652          | 0.099          |
|                                    | None under net         | Ref               |                 |                 |                |                |
| Eaves                              | Closed                 | 0.34              | 0.18            | 0.67            | -3.165         | 0.002          |
|                                    | Partially open         | 0.60              | 0.32            | 1.13            | -1.583         | 0.114          |
|                                    | Open                   | Ref               |                 |                 |                |                |
| Cattle                             | Yes                    | 1.53              | 1.00            | 2.34            | 1.944          | 0.052          |
|                                    | No                     | Ref               |                 |                 |                |                |
| Period<br>(Conditional on IRS)     | Post Spray             | 0.60              | 0.33            | 1.09            | -1.681         | 0.093          |
|                                    | Pre Spray              | Ref               |                 |                 |                |                |
| Period<br>(Conditional on non-IRS) | Post Spray             | 1.64              | 0.87            | 3.09            | 1.543          | 0.123          |
|                                    | Pre Spray              | Ref               |                 |                 |                |                |
